# Supplementary material
Source: PubMed Central journal article supplement (PMC3051033)

## Supplemental Figure 1.

**Comparison between untreated control with control + CL and untreated KC-Tie2 mice with KC-Tie2 + PBSL animals.** Antigen presenting cell numbers (a), epidermal thickness (b), number of cutaneous blood vessels stained with MECA (c), and T cell numbers (d) were not statistically different between control mice that were left untreated versus control mice treated with clodronate encapsulated liposomes or between KC-Tie2 mice that were left untreated versus those treated with PBS encapsulated liposomes. Modest decreases in CD11c<sup>+</sup> cell (a) numbers for both control and KC-Tie2 mice treated with their respective liposomes failed to reach statistical significance (p values as indicated).

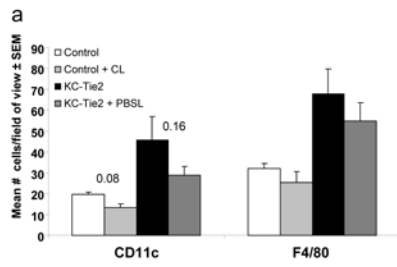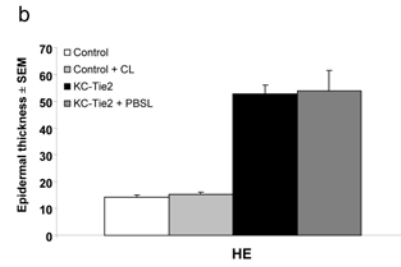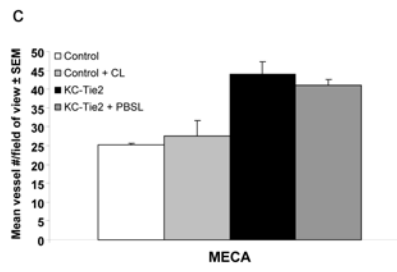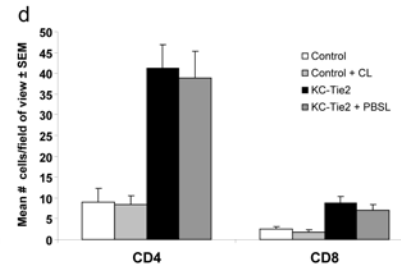

Supplement: NIHMS253629-supplement-Supp_Fig_S1.pdf [file NIHMS253629-supplement-Supp_Fig_S1.pdf]
